# Supplementary material
Source: publisher site journal article supplement (https://static.cambridge.org/content/id/urn:cambridge.org:id:article:S0962728600004954/resource/name/De_Vries_etal_Appendix1.pdf)
Supplement: Supplementary file 1 [file De_Vries_etal_Appendix1.pdf]

APPENDIX 1. Probabilities of predictors used in the final models for prediction of animal-based Welfare Quality® indicators. Indicators were not used as potential predictors when they belonged to the same assessment method as the outcome variable (indicated in grey).

**Animal-based Welfare Quality® indicator (outcome variable):**

| Predictor:                   | ADF index | QBA index + 10 | Freq. head butts/cow/h | Freq. displacements/cow/h | Mean time to lie down (s) | % of cows: | - colliding with stall | - lying outside lying area | - dirty hind legs | - dirty udder | - dirty hind quarters | - ocular discharge | - nasal discharge | - diarrhoea | - vulvar discharge | - very lean | - lame | - severely lame | - hairless patches | - lesions/swellings |
|------------------------------|-----------|----------------|------------------------|---------------------------|---------------------------|------------|------------------------|----------------------------|-------------------|---------------|-----------------------|--------------------|-------------------|-------------|--------------------|-------------|--------|-----------------|--------------------|---------------------|
| Herd size                    |           | **             |                        |                           |                           |            |                        |                            |                   |               |                       | +                  |                   |             | *                  |             |        | *               |                    |                     |
| ADF index                    | ■         | **             |                        |                           |                           |            |                        | *                          |                   |               |                       |                    |                   |             |                    |             | **     | **              |                    | *                   |
| QBA index                    | ***       | ■              |                        | **                        |                           |            |                        | *                          |                   |               |                       |                    |                   |             |                    |             | **     | **              |                    | +                   |
| Freq. head butts/cow/h       |           |                | ■                      |                           |                           |            |                        |                            |                   |               | *                     |                    |                   | **          | **                 |             | +      | +               | +                  |                     |
| Freq. displacements/cow/h    |           | *              |                        | ■                         |                           |            |                        |                            |                   |               |                       |                    | **                |             |                    | +           |        |                 |                    |                     |
| Freq. coughing/cow/15minutes |           |                |                        |                           | ■                         |            |                        |                            |                   |               |                       |                    | *                 |             |                    |             |        | *               |                    |                     |
| Mean time to lie down (s)    |           |                |                        |                           |                           | ■          |                        |                            |                   | +             |                       |                    |                   |             |                    |             | *      | ***             |                    |                     |
| % of cows:                   |           |                |                        |                           |                           |            | ■                      |                            |                   |               |                       |                    |                   |             |                    |             |        |                 |                    |                     |
| - colliding with stall       |           |                |                        |                           |                           |            |                        |                            |                   |               |                       | *                  |                   | †           | **                 | ***         |        |                 |                    | *                   |
| - lying outside lying area   | *         | *              |                        |                           |                           |            |                        |                            |                   |               |                       |                    |                   |             | *                  |             |        |                 | **                 | **                  |
| - dirty hind legs            | *         |                | **                     | †                         | *                         |            |                        |                            |                   |               |                       |                    |                   |             | **                 |             |        |                 |                    |                     |
| - dirty udder                |           |                |                        |                           |                           |            | *                      | †                          |                   |               |                       |                    |                   |             |                    |             |        |                 |                    |                     |
| - dirty hindquarters         |           |                | *                      |                           |                           |            |                        |                            |                   |               |                       |                    |                   |             |                    |             |        |                 |                    |                     |
| - ocular discharge           |           |                |                        |                           | *                         |            | **                     |                            |                   |               |                       |                    |                   |             |                    |             |        |                 |                    |                     |
| - nasal discharge            |           |                |                        | *                         |                           |            |                        |                            |                   |               |                       |                    |                   |             |                    |             |        |                 |                    |                     |
| - diarrhoea                  |           |                | **                     |                           |                           |            | +                      |                            |                   |               |                       |                    |                   |             |                    |             |        |                 |                    |                     |
| - vulvar discharge           |           | +              |                        | *                         |                           |            |                        |                            |                   |               |                       |                    |                   |             |                    |             |        |                 |                    |                     |
